# Supplementary material
Source: PubMed Central journal article supplement (PMC419954)

**Expression analysis of a highly adherent and cytotoxic  
small colony variant of *Pseudomonas aeruginosa* isolated from  
a cystic fibrosis lung**

Franz von Götzt<sup>1,2</sup>, Susanne Häussler<sup>1</sup>, Doris Jordan<sup>1</sup>, Senthilselvan Saravanamuthu<sup>1</sup>, Dirk Wehmhöner<sup>1,3</sup>, Andre Strüßmann<sup>1</sup>, Joerg Lauber<sup>3</sup>, Ina Attree<sup>4</sup>, Jan Buer<sup>1,3</sup>, Burkhard Tümmler<sup>2</sup> and Ivo Steinmetz<sup>1</sup>

Institute of Medical Microbiology<sup>1</sup> and Department of Pediatric Pneumology<sup>2</sup>, Hannover Medical School, Carl-Neuberg-Str.1 30625 Hannover, Germany, German Research Centre for Biotechnology, Mascheroder Weg 1, 38124 Braunschweig, Germany<sup>3</sup>; Biochimie et Biophysique des Systèmes Intégrés (UMR-5092 CNRS/CEA/UJF), DBMS, CEA, 17 Avenue des Martyrs, 38054 Grenoble cedex 09, France<sup>4</sup>

**Supplemental material**

**Table 3.** Differential expression of genes in *P. aeruginosa* 20265 SCV, wildtype and revertant during exponential and stationary growth.

**Figure 6.** Genes of *P. aeruginosa* PAO1 not included in the genome of *P. aeruginosa* 20265 (shown are gene clusters of at least 3 genes).

**TABLE 3.** Differentially regulated genes<sup>1</sup> in *P. aeruginosa* 20265 SCV, wildtype and revertant during exponential and stationary growth.

| Gene Name / GenBank<br>Accession Number <sup>2</sup> | Exponential phase |            |             | Stationary phase |         |             | Protein Name / GenBank definition <sup>2</sup>                                              | Confidence<br>class <sup>2</sup> | Function <sup>2</sup>                                                                             |
|------------------------------------------------------|-------------------|------------|-------------|------------------|---------|-------------|---------------------------------------------------------------------------------------------|----------------------------------|---------------------------------------------------------------------------------------------------|
|                                                      | SCV/WT            | SCV/REV    | WT/REV      | SCV/WT           | SCV/REV | WT/REV      |                                                                                             |                                  |                                                                                                   |
| PA0039                                               |                   | 4.1 (0.2)  | 2.9 (0.4)   |                  |         | 2.2 (0.1)   | hypothetical protein                                                                        | Class 4                          | Hypothetical, unclassified, unknown                                                               |
| PA0044_ <i>exoT</i>                                  | 67.1 (27.0)       | 4.2 (1.5)  | -15.3 (7.7) |                  |         |             | exoenzyme T                                                                                 | Class 1                          | Secreted Factors (toxins, enzymes, alginate)                                                      |
| PA0046                                               |                   | 3.6 (0.9)  |             |                  |         |             | hypothetical protein                                                                        | Class 4                          | Hypothetical, unclassified, unknown                                                               |
| PA0047                                               |                   | 6.3 (2.1)  |             |                  |         |             | hypothetical protein                                                                        | Class 4                          | Hypothetical, unclassified, unknown                                                               |
| PA0059_ <i>osmC</i>                                  |                   |            | 3.1 (0.4)   |                  |         |             | osmotically inducible protein OsmC                                                          | Class 2                          | Adaptation, protection                                                                            |
| PA0070                                               | -16.7 (2.0)       |            | 24.4 (8.1)  |                  |         |             | hypothetical protein                                                                        | Class 4                          | Hypothetical, unclassified, unknown;Membrane proteins                                             |
| PA0073                                               | -4.7 (0.2)        |            |             |                  |         |             | probable ATP-binding component of ABC transporter                                           | Class 3                          | Transport of small molecules                                                                      |
| PA0075                                               | -11.3 (6.6)       |            | 4.7 (2.2)   |                  |         |             | probable phosphoprotein phosphatase                                                         | Class 3                          | Putative enzymes                                                                                  |
| PA0076                                               | -25.2 (12.4)      |            |             |                  |         |             | hypothetical protein                                                                        | Class 4                          | Hypothetical, unclassified, unknown                                                               |
| PA0077                                               | -7.5 (3.2)        |            |             |                  |         |             | hypothetical protein                                                                        | Class 4                          | Hypothetical, unclassified, unknown                                                               |
| PA0082                                               | -15.4 (7.1)       |            | 30.1 (17.7) |                  |         |             | hypothetical protein                                                                        | Class 4                          | Hypothetical, unclassified, unknown                                                               |
| PA0083                                               | -20.6 (3.1)       |            | 15.8 (3.8)  |                  |         | 8.6 (6.8)   | conserved hypothetical protein                                                              | Class 4                          | Hypothetical, unclassified, unknown                                                               |
| PA0084                                               | -10.8 (3.7)       |            | 5.6 (1.1)   |                  |         |             | conserved hypothetical protein                                                              | Class 4                          | Hypothetical, unclassified, unknown                                                               |
| PA0085                                               | -15.5 (1.9)       |            | 30.3 (26.3) |                  |         |             | conserved hypothetical protein                                                              | Class 4                          | Hypothetical, unclassified, unknown                                                               |
| PA0086                                               | -4.9 (0.7)        |            | 4.3 (0.5)   |                  |         |             | hypothetical protein                                                                        | Class 4                          | Hypothetical, unclassified, unknown                                                               |
| PA0088                                               | -8.4 (3.9)        |            |             |                  |         |             | hypothetical protein                                                                        | Class 4                          | Hypothetical, unclassified, unknown                                                               |
| PA0090                                               | -12.5 (4.5)       |            |             |                  |         |             | probable ClpA/B-type chaperone                                                              | Class 3                          | Translation, post-translational modification, degradation                                         |
| PA0102                                               | 2.4 (0.3)         | 5.4 (0.6)  |             |                  |         |             | probable carbonic anhydrase                                                                 | Class 3                          | Central intermediary metabolism                                                                   |
| PA0126                                               | -4.9 (1.0)        |            |             |                  |         |             | hypothetical protein                                                                        | Class 4                          | Hypothetical, unclassified, unknown                                                               |
| PA0146                                               |                   |            |             | -2.8 (0.8)       |         |             | conserved hypothetical protein                                                              | Class 4                          | Hypothetical, unclassified, unknown                                                               |
| PA0176                                               |                   |            |             | -2.2 (0.2)       |         |             | probable chemotaxis transducer                                                              | Class 3                          | Adaptation, protection;Chemotaxis                                                                 |
| PA0187                                               |                   |            |             | -2.3 (0.1)       |         | 2.3 (0.3)   | hypothetical protein                                                                        | Class 4                          | Hypothetical, unclassified, unknown                                                               |
| PA0194                                               |                   | -2.8 (0.6) |             |                  |         |             | hypothetical protein                                                                        | Class 4                          | Hypothetical, unclassified, unknown;Putative enzymes                                              |
| PA0316_ <i>serA</i>                                  | 3.0 (0.2)         |            |             |                  |         |             | D-3-phosphoglycerate dehydrogenase                                                          | Class 2                          | Amino acid biosynthesis and metabolism                                                            |
| PA0427_ <i>oprM</i>                                  |                   |            |             |                  |         | -2.3 (0.2)  | major intrinsic multiple antibiotic resistance efflux outer membrane protein OprM precursor | Class 1                          | Membrane proteins;Transport of small molecules;Antibiotic resistance and susceptibility           |
| PA0443                                               |                   |            |             |                  |         | 2.5 (0.3)   | probable transporter                                                                        | Class 3                          | Membrane proteins;Transport of small molecules                                                    |
| PA0444                                               |                   |            |             | -2.4 (0.2)       |         |             | N-carbamoyl-beta-alanine amidohydrolase                                                     | Class 2                          | Nucleotide biosynthesis and metabolism                                                            |
| PA0460                                               | 4.3 (0.7)         |            | -3.4 (0.3)  |                  |         |             | hypothetical protein                                                                        | Class 4                          | Hypothetical, unclassified, unknown                                                               |
| PA0471                                               | -5.1 (0.8)        |            |             |                  |         |             | probable transmembrane sensor                                                               | Class 3                          | Membrane proteins;Transcriptional regulators;Two-component regulatory systems                     |
| PA0472                                               | -3.4 (1.0)        |            |             |                  |         |             | probable sigma-70 factor, ECF subfamily                                                     | Class 3                          | Transcriptional regulators                                                                        |
| PA0537                                               | -2.6 (0.2)        |            |             |                  |         |             | conserved hypothetical protein                                                              | Class 4                          | Hypothetical, unclassified, unknown                                                               |
| PA0538_ <i>dsbB</i>                                  | -24.6 (11.1)      |            | 6.2 (1.2)   |                  |         | 7.1 (3.6)   | disulfide bond formation protein                                                            | Class 2                          | Chaperones & heat shock proteins;Translation, post-translational modification, degradation        |
| PA0563                                               | -5.9 (0.4)        |            | 4.8 (1.9)   |                  |         |             | conserved hypothetical protein                                                              | Class 4                          | Hypothetical, unclassified, unknown                                                               |
| PA0567                                               |                   |            |             |                  |         | 3.1 (1.1)   | conserved hypothetical protein                                                              | Class 4                          | Membrane proteins;Hypothetical, unclassified, unknown                                             |
| PA0633                                               | -6.2 (2.5)        |            |             |                  |         |             | hypothetical protein                                                                        | Class 4                          | Related to phage, transposon, or plasmid                                                          |
| PA0636                                               | -5.4 (1.0)        |            |             |                  |         |             | hypothetical protein                                                                        | Class 4                          | Related to phage, transposon, or plasmid                                                          |
| PA0639                                               | -3.0 (0.7)        |            |             |                  |         |             | conserved hypothetical protein                                                              | Class 4                          | Related to phage, transposon, or plasmid                                                          |
| PA0659                                               | -2.1 (0.1)        |            |             |                  |         |             | hypothetical protein                                                                        | Class 4                          | Hypothetical, unclassified, unknown;Membrane proteins                                             |
| PA0733                                               |                   | -2.9 (0.6) |             |                  |         |             | probable pseudouridylylase synthase                                                         | Class 3                          | Transcription, RNA processing and degradation                                                     |
| PA0762_ <i>algU</i>                                  | 2.9 (0.6)         |            |             |                  |         |             | sigma factor AlgU                                                                           | Class 1                          | Transcriptional regulators                                                                        |
| PA0764_ <i>mucB</i>                                  | -2.6 (0.5)        |            | 2.7 (0.3)   |                  |         |             | negative regulator for alginate biosynthesis MucB                                           | Class 1                          | Cell wall / LPS / capsule;Transcriptional regulators;Secreted Factors (toxins, enzymes, alginate) |
| PA0795_ <i>prpC</i>                                  |                   |            |             |                  |         | 2.1 (0.2)   | citrate synthase 2                                                                          | Class 2                          | Carbon compound catabolism;Central intermediary metabolism                                        |
| PA0805                                               |                   | 5.5 (2.6)  |             |                  |         |             | hypothetical protein                                                                        | Class 4                          | Hypothetical, unclassified, unknown                                                               |
| PA0833                                               | 4.8 (0.2)         |            | -4.1 (0.4)  |                  |         |             | hypothetical protein                                                                        | Class 4                          | Hypothetical, unclassified, unknown;Membrane proteins                                             |
| PA0853                                               | 2.0 (0.1)         |            |             |                  |         |             | probable oxidoreductase                                                                     | Class 3                          | Putative enzymes                                                                                  |
| PA0854_ <i>fumC2</i>                                 |                   |            | -2.7 (0.1)  |                  |         |             | fumarate hydratase                                                                          | Class 2                          | Carbon compound catabolism;Energy metabolism                                                      |
| PA0867                                               |                   | 3.3 (0.3)  | 2.7 (0.1)   |                  |         |             | hypothetical protein                                                                        | Class 4                          | Hypothetical, unclassified, unknown                                                               |
| PA0869_ <i>pbpG</i>                                  | -3.2 (0.3)        |            |             |                  |         |             | D-alanyl-D-alanine-endopeptidase                                                            | Class 1                          | Cell wall / LPS / capsule                                                                         |
| PA0887_ <i>acsA</i>                                  |                   |            |             | 10.0 (1.8)       |         | -11.1 (2.1) | acetyl-coenzyme A synthetase                                                                | Class 2                          | Carbon compound catabolism;Central intermediary metabolism                                        |
| PA0968                                               | -2.4 (0.3)        |            |             |                  |         |             | conserved hypothetical protein                                                              | Class 4                          | Hypothetical, unclassified, unknown                                                               |
| PA1001_ <i>phnA</i>                                  |                   |            |             | -2.4 (0.3)       |         |             | anthranilate synthase component I                                                           | Class 1                          | Adaptation, protection                                                                            |
| PA1076                                               |                   | 4.5 (2.9)  |             |                  |         |             | hypothetical protein                                                                        | Class 4                          | Hypothetical, unclassified, unknown                                                               |
| PA1079_ <i>flgD</i>                                  |                   |            |             |                  |         | -2.9 (0.5)  | flagellar basal-body rod modification protein FlgD                                          | Class 2                          | Motility & Attachment;Cell wall / LPS / capsule                                                   |
| PA1080_ <i>flgE</i>                                  |                   | -5.5 (1.6) |             |                  |         |             | flagellar hook protein FlgE                                                                 | Class 2                          | Motility & Attachment;Cell wall / LPS / capsule                                                   |
| PA1082_ <i>flgG</i>                                  |                   | -4.4 (1.4) |             |                  |         |             | flagellar basal-body rod protein FlgG                                                       | Class 2                          | Motility & Attachment;Cell wall / LPS / capsule                                                   |
| PA1095_ <i>flgJ</i>                                  |                   | -4.2 (0.8) |             |                  |         |             | flagellar protein FlgJ                                                                      | Class 2                          | Motility & Attachment;Cell wall / LPS / capsule                                                   |
| PA1096_ <i>flaS</i>                                  |                   |            |             |                  |         | -2.6 (0.3)  | two-component sensor                                                                        | Class 1                          | Two-component regulatory systems                                                                  |
| PA1099_ <i>flaR</i>                                  |                   |            |             |                  |         | -2.5 (0.3)  | two-component response regulator                                                            | Class 1                          | Transcriptional regulators;Two-component regulatory systems;Motility & Attachment                 |
| PA1101_ <i>flaF</i>                                  |                   | -5.2 (2.9) |             |                  |         |             | flagellar M-ring outer membrane protein precursor                                           | Class 1                          | Motility & Attachment;Cell wall / LPS / capsule                                                   |
| PA1137                                               |                   |            |             |                  |         | -5.0 (2.9)  | probable oxidoreductase                                                                     | Class 3                          | Putative enzymes                                                                                  |
| PA1155_ <i>nrdB</i>                                  |                   |            |             | -2.4 (0.5)       |         |             | ribonucleoside reductase, small chain                                                       | Class 2                          | Nucleotide biosynthesis and metabolism                                                            |
| PA1200                                               | -3.4 (0.4)        |            |             |                  |         |             | conserved hypothetical protein                                                              | Class 4                          | Hypothetical, unclassified, unknown                                                               |
| PA1202                                               | -9.6 (1.2)        |            | 9.7 (2.7)   | -5.8 (2.2)       |         | 4.5 (0.5)   | probable hydrolase                                                                          | Class 3                          | Putative enzymes                                                                                  |
| PA1245                                               |                   |            |             | -5.4 (1.1)       |         | 4.2 (0.5)   | hypothetical protein                                                                        | Class 4                          | Hypothetical, unclassified, unknown;Membrane proteins                                             |
| PA1248_ <i>aprF</i>                                  |                   |            |             | -4.0 (2.1)       |         |             | alkaline protease secretion protein AprF                                                    | Class 1                          | Protein secretion/export apparatus;Secreted Factors (toxins, enzymes, alginate)                   |
| PA1441                                               |                   | -3.6 (0.7) |             |                  |         |             | hypothetical protein                                                                        | Class 4                          | Hypothetical, unclassified, unknown                                                               |
| PA1467                                               | -3.2 (0.9)        |            |             |                  |         |             | hypothetical protein                                                                        | Class 4                          | Hypothetical, unclassified, unknown                                                               |
| PA1471                                               |                   |            |             | -3.0 (0.5)       |         |             | hypothetical protein                                                                        | Class 4                          | Hypothetical, unclassified, unknown                                                               |
| PA1474                                               |                   |            |             |                  |         | -3.9 (2.2)  | hypothetical protein                                                                        | Class 4                          | Hypothetical, unclassified, unknown                                                               |
| PA1494                                               | -3.6 (0.7)        |            |             | -3.0 (0.6)       |         | 2.9 (0.4)   | conserved hypothetical protein                                                              | Class 4                          | Hypothetical, unclassified, unknown                                                               |
| PA1545                                               |                   |            |             |                  |         | -3.8 (1.4)  | hypothetical protein                                                                        | Class 4                          | Hypothetical, unclassified, unknown                                                               |

| Gene Name / GenBank<br>Accession Number <sup>2</sup> | Exponential phase |            |              | Stationary phase |            |            | Protein Name / GenBank definition <sup>2</sup>                     | Confidence<br>class <sup>2</sup> | Function <sup>2</sup>                                                                                  |
|------------------------------------------------------|-------------------|------------|--------------|------------------|------------|------------|--------------------------------------------------------------------|----------------------------------|--------------------------------------------------------------------------------------------------------|
|                                                      | SCV/WT            | SCV/REV    | WT/REV       | SCV/WT           | SCV/REV    | WT/REV     |                                                                    |                                  |                                                                                                        |
| PA1546_hemN                                          | 2.7 (0.3)         |            |              |                  |            |            | oxygen-independent coproporphyrinogen III oxidase                  | Class 1                          | Biosynthesis of cofactors, prosthetic groups and carriers                                              |
| PA1571                                               | 2.5 (0.2)         | 3.8 (0.5)  |              |                  |            |            | hypothetical protein                                               | Class 4                          | Hypothetical, unclassified, unknown                                                                    |
| PA1589_sucD                                          | 2.3 (0.2)         |            |              |                  |            |            | succinyl-CoA synthetase alpha chain                                | Class 2                          | Energy metabolism                                                                                      |
| PA1592_i                                             |                   |            |              | -3.1 (1.1)       |            |            | hypothetical protein                                               | Class 4                          | Hypothetical, unclassified, unknown                                                                    |
| PA1597                                               |                   | 5.4 (3.7)  |              |                  |            |            | hypothetical protein                                               | Class 4                          | Hypothetical, unclassified, unknown                                                                    |
| PA1624                                               |                   |            |              |                  |            | -2.5 (0.1) | hypothetical protein                                               | Class 4                          | Hypothetical, unclassified, unknown                                                                    |
| PA1673                                               | 2.7 (0.7)         |            |              |                  |            |            | hypothetical protein                                               | Class 4                          | Hypothetical, unclassified, unknown                                                                    |
| PA1692                                               | 9.6 (1.2)         | 3.4 (0.9)  |              |                  |            |            | probable translocation protein in type III secretion               | Class 3                          | Protein secretion/export apparatus                                                                     |
| PA1694_pscQ                                          | 57.1 (46.1)       | 3.8 (1.0)  | -20.9 (19.2) |                  |            |            | translocation protein in type III secretion                        | Class 2                          | Protein secretion/export apparatus                                                                     |
| PA1695_pscP                                          | 7.1 (2.5)         | 2.6 (0.3)  | -2.7 (0.9)   |                  |            |            | translocation protein in type III secretion                        | Class 2                          | Protein secretion/export apparatus                                                                     |
| PA1696_pscO                                          | 40.1 (1.4)        | 4.2 (0.6)  | -10.2 (2.2)  |                  |            |            | translocation protein in type III secretion                        | Class 2                          | Protein secretion/export apparatus                                                                     |
| PA1697                                               | 10.6 (1.0)        | 3.4 (0.8)  | -3.0 (0.5)   |                  |            |            | ATP synthase in type III secretion system                          | Class 2                          | Protein secretion/export apparatus                                                                     |
| PA1699_popN                                          | 29.9 (16.1)       | 5.2 (1.0)  | -6.0 (2.6)   |                  |            |            | outer membrane protein PopN                                        | Class 1                          | Membrane proteins;Protein secretion/export apparatus                                                   |
| PA1699                                               | 79.4 (20.4)       | 4.7 (0.7)  | -16.2 (7.6)  |                  |            |            | conserved hypothetical protein in type III secretion               | Class 4                          | Hypothetical, unclassified, unknown;Protein secretion/export apparatus                                 |
| PA1700                                               | 36.9 (13.6)       | 5.2 (1.7)  | -7.2 (6.0)   |                  |            |            | conserved hypothetical protein in type III secretion               | Class 4                          | Hypothetical, unclassified, unknown;Protein secretion/export apparatus                                 |
| PA1701                                               | 34.9 (10.3)       | 4.9 (1.6)  | -7.9 (3.4)   |                  |            |            | conserved hypothetical protein in type III secretion               | Class 4                          | Hypothetical, unclassified, unknown;Protein secretion/export apparatus                                 |
| PA1702                                               | 43.0 (2.8)        | 7.0 (1.7)  |              |                  |            |            | type III secretory apparatus protein PcrD                          | Class 1                          | Protein secretion/export apparatus                                                                     |
| PA1703_pcrD                                          | 7.7 (1.1)         | 3.3 (0.6)  |              |                  |            |            | transcriptional regulator protein PcrR                             | Class 1                          | Transcriptional regulators                                                                             |
| PA1704_pcrR                                          | 28.1 (4.5)        | 4.5 (0.6)  |              |                  |            |            | regulator in type III secretion                                    | Class 1                          | Protein secretion/export apparatus                                                                     |
| PA1705_pcrG                                          | 5.9 (2.5)         |            |              |                  |            |            | type III secretion protein PcrV                                    | Class 1                          | Protein secretion/export apparatus                                                                     |
| PA1706_pcrV                                          | 268.2 (173.3)     | 4.3 (1.0)  | -54.7 (55.8) | 26.0 (8.2)       |            | -8.8 (3.4) | regulatory protein PcrH                                            | Class 1                          | Protein secretion/export apparatus;Secreted Factors (toxins, enzymes, alginate)                        |
| PA1707_pcrH                                          | 42.7 (7.0)        | 4.2 (1.0)  | -12.6 (3.0)  | 9.6 (5.4)        |            |            | translocator protein PopB                                          | Class 1                          | Protein secretion/export apparatus                                                                     |
| PA1708_popB                                          | 137.7 (33.4)      | 3.4 (0.8)  | -37.0 (10.7) | 7.5 (1.3)        |            | -4.2 (0.4) | translocator protein PopD                                          | Class 1                          | Protein secretion/export apparatus                                                                     |
| PA1709_popD                                          | 60.9 (4.0)        | 4.6 (1.1)  | -12.0 (3.1)  |                  |            |            | exoenzyme S synthesis protein C precursor                          | Class 1                          | Protein secretion/export apparatus;Translation, post-translational modification, degradation           |
| PA1710_exsC                                          | 13.1 (2.1)        | 4.0 (1.5)  | -3.3 (0.6)   | 8.5 (1.5)        |            | -5.6 (1.0) | hypothetical protein                                               | Class 4                          | Hypothetical, unclassified, unknown                                                                    |
| PA1711                                               | 11.3 (0.6)        | 3.2 (0.8)  | -3.5 (0.7)   | 8.2 (0.9)        |            | -5.0 (0.9) | exoenzyme S synthesis protein B                                    | Class 1                          | Protein secretion/export apparatus;Translation, post-translational modification, degradation           |
| PA1712_exsB                                          | 5.3 (0.5)         | 2.8 (0.3)  |              | 8.2 (3.4)        |            |            | hypothetical protein                                               | Class 4                          | Hypothetical, unclassified, unknown                                                                    |
| PA1714                                               | 14.9 (0.0)        | 4.9 (1.1)  | -3.4 (0.6)   |                  |            |            | type III export apparatus protein                                  | Class 1                          | Protein secretion/export apparatus                                                                     |
| PA1715_pscB                                          | 45.7 (7.3)        | 5.6 (1.0)  | -13.2 (3.0)  |                  |            |            | type III secretion protein PscC                                    | Class 1                          | Protein secretion/export apparatus                                                                     |
| PA1716_pscC                                          | 9.0 (1.6)         | 3.2 (0.6)  |              |                  |            |            | type III export protein PscD                                       | Class 1                          | Protein secretion/export apparatus                                                                     |
| PA1717_pscD                                          | 24.2 (12.0)       | 5.6 (0.2)  | -3.9 (0.9)   |                  |            |            | type III export protein PscE                                       | Class 1                          | Protein secretion/export apparatus                                                                     |
| PA1718_pscE                                          | 33.2 (2.2)        | 4.0 (0.2)  | -8.5 (0.9)   |                  |            |            | type III export protein PscF                                       | Class 1                          | Protein secretion/export apparatus                                                                     |
| PA1719_pscF                                          | 42.3 (27.7)       | 3.6 (0.9)  | -15.3 (11.0) |                  |            |            | type III export protein PscG                                       | Class 2                          | Protein secretion/export apparatus                                                                     |
| PA1720_pscG                                          | 21.1 (6.0)        | 6.0 (0.6)  |              |                  |            |            | type III export protein PscH                                       | Class 1                          | Protein secretion/export apparatus                                                                     |
| PA1721_pscH                                          | 9.9 (2.4)         | 4.5 (1.1)  |              |                  |            |            | type III export protein PscI                                       | Class 1                          | Protein secretion/export apparatus                                                                     |
| PA1722_pscI                                          | 11.5 (3.4)        | 3.9 (0.9)  | -3.9 (1.0)   |                  |            |            | type III export protein PscJ                                       | Class 1                          | Protein secretion/export apparatus                                                                     |
| PA1723_pscJ                                          | 4.9 (0.7)         | 3.8 (0.3)  |              |                  |            |            | type III export protein PscK                                       | Class 1                          | Protein secretion/export apparatus                                                                     |
| PA1724_pscK                                          | 6.4 (1.4)         | 3.5 (0.8)  |              |                  |            |            | type III export protein PscL                                       | Class 1                          | Protein secretion/export apparatus                                                                     |
| PA1725_pscL                                          | 12.3 (4.3)        | 4.0 (0.7)  |              |                  |            |            | conserved hypothetical protein                                     | Class 4                          | Hypothetical, unclassified, unknown                                                                    |
| PA1730                                               |                   |            |              | -3.0 (0.5)       |            | 2.4 (0.3)  | conserved hypothetical protein                                     | Class 4                          | Hypothetical, unclassified, unknown                                                                    |
| PA1731                                               |                   |            |              | -2.2 (0.2)       |            |            | conserved hypothetical protein                                     | Class 4                          | Hypothetical, unclassified, unknown                                                                    |
| PA1732                                               |                   |            |              |                  |            | 2.2 (0.2)  | conserved hypothetical protein                                     | Class 4                          | Hypothetical, unclassified, unknown                                                                    |
| PA1733                                               |                   |            |              | -2.5 (0.3)       |            | 2.6 (0.1)  | conserved hypothetical protein                                     | Class 4                          | Hypothetical, unclassified, unknown                                                                    |
| PA1762                                               | -2.5 (0.4)        |            |              | -2.8 (0.9)       |            |            | probable serine/threonine-protein kinase                           | Class 3                          | Adaptation, protection                                                                                 |
| PA1842                                               | 4.1 (0.9)         |            |              |                  |            |            | hypothetical protein                                               | Class 4                          | Hypothetical, unclassified, unknown                                                                    |
| PA1852                                               |                   | 4.5 (1.3)  |              |                  |            | 2.8 (0.2)  | hypothetical protein                                               | Class 4                          | Hypothetical, unclassified, unknown                                                                    |
| PA1862_modB                                          | 9.7 (2.0)         | 4.3 (0.7)  |              |                  |            |            | molybdenum transport protein ModB                                  | Class 2                          | Transport of small molecules                                                                           |
| PA1863_modA                                          | 5.5 (0.8)         | 6.3 (3.1)  |              |                  |            |            | molybdate-binding periplasmic protein precursor ModA               | Class 2                          | Transport of small molecules                                                                           |
| PA1871_lasA                                          |                   |            |              | -2.3 (0.4)       |            |            | LasA protease precursor                                            | Class 1                          | Translation, post-translational modification, degradation;Secreted Factors (toxins, enzymes, alginate) |
| PA1901_phzC2                                         |                   |            |              | -9.1 (5.9)       |            | 8.9 (5.5)  | phenazine biosynthesis protein PhzC                                | Class 1                          | Secreted Factors (toxins, enzymes, alginate)                                                           |
| PA1924                                               |                   |            |              |                  |            |            | hypothetical protein                                               | Class 4                          | Hypothetical, unclassified, unknown                                                                    |
| PA1967                                               |                   |            |              | -4.5 (1.3)       | -3.7 (1.3) |            | hypothetical protein                                               | Class 4                          | Hypothetical, unclassified, unknown                                                                    |
| PA1984                                               |                   | -4.1 (1.7) | -10.5 (7.7)  | 8.7 (1.7)        |            | -9.8 (1.5) | probable aldehyde dehydrogenase                                    | Class 3                          | Putative enzymes                                                                                       |
| PA1999                                               |                   |            |              | -8.7 (0.8)       |            | -8.3 (1.1) | probable CoA transferase, subunit A                                | Class 3                          | Amino acid biosynthesis and metabolism;Carbon compound catabolism                                      |
| PA2000                                               |                   |            |              | -6.3 (1.0)       |            | -4.4 (0.9) | probable CoA transferase, subunit B                                | Class 3                          | Amino acid biosynthesis and metabolism;Carbon compound catabolism                                      |
| PA2001_atoB                                          |                   |            |              | -4.4 (0.9)       |            | -3.9 (0.9) | acetyl-CoA acetyltransferase                                       | Class 2                          | Central intermediary metabolism;Fatty acid and phospholipid metabolism                                 |
| PA2003_bdhA                                          |                   |            |              | -3.9 (0.9)       |            | 16.7 (8.0) | 3-hydroxybutyrate dehydrogenase                                    | Class 2                          | Carbon compound catabolism                                                                             |
| PA2025_gor                                           |                   |            |              | -4.4 (0.8)       |            | 4.5 (0.7)  | glutathione reductase                                              | Class 1                          | Biosynthesis of cofactors, prosthetic groups and carriers;Amino acid biosynthesis and metabolism       |
| PA2027                                               |                   |            |              | -3.9 (0.9)       |            |            | hypothetical protein                                               | Class 4                          | Hypothetical, unclassified, unknown                                                                    |
| PA2047                                               | -7.2 (3.3)        |            |              |                  |            |            | probable transcriptional regulator                                 | Class 3                          | Transcriptional regulators                                                                             |
| PA2069                                               |                   |            |              | -2.1 (0.0)       |            |            | probable carbamoyl transferase                                     | Class 3                          | Putative enzymes                                                                                       |
| PA2166                                               | -3.2 (0.4)        |            | 3.1 (0.5)    |                  |            |            | hypothetical protein                                               | Class 4                          | Hypothetical, unclassified, unknown                                                                    |
| PA2191_exoY                                          | 31.7 (10.6)       | 6.8 (2.7)  |              |                  |            | 3.5 (1.0)  | adenylate cyclase ExoY                                             | Class 1                          | Secreted Factors (toxins, enzymes, alginate)                                                           |
| PA2193_hcnA                                          |                   |            |              |                  |            |            | hydrogen cyanide synthase HcnA                                     | Class 2                          | Central intermediary metabolism                                                                        |
| PA2204                                               |                   | -2.2 (0.3) |              |                  |            |            | probable binding protein component of ABC transporter              | Class 3                          | Transport of small molecules                                                                           |
| PA2233                                               |                   |            |              | -3.0 (0.6)       |            |            | probable glycosyl transferase                                      | Class 3                          | Putative enzymes                                                                                       |
| PA2235                                               |                   |            |              | -12.0 (1.5)      |            |            | hypothetical protein                                               | Class 4                          | Hypothetical, unclassified, unknown                                                                    |
| PA2247_bkdA1                                         |                   |            |              | -3.2 (1.2)       |            | 5.3 (2.3)  | 2-oxoisovalerate dehydrogenase (alpha subunit)                     | Class 2                          | Amino acid biosynthesis and metabolism                                                                 |
| PA2248_bkdA2                                         |                   |            |              | -3.8 (0.7)       |            | 4.0 (0.7)  | 2-oxoisovalerate dehydrogenase (beta subunit)                      | Class 2                          | Amino acid biosynthesis and metabolism                                                                 |
| PA2249_bkdB                                          |                   |            |              | -6.8 (4.7)       |            |            | branched-chain alpha-keto acid dehydrogenase (lipoamide component) | Class 2                          | Amino acid biosynthesis and metabolism                                                                 |
| PA2259_ptxS                                          | 2.3 (0.1)         |            |              |                  |            |            | transcriptional regulator PtxS                                     | Class 1                          | Transcriptional regulators;Secreted Factors (toxins, enzymes, alginate)                                |
| PA2270                                               | -3.1 (0.5)        |            |              |                  |            |            | probable transcriptional regulator                                 | Class 3                          | Transcriptional regulators                                                                             |
| PA2300_chic                                          |                   |            |              |                  |            | 3.3 (0.6)  | chitinase                                                          | Class 2                          | Carbon compound catabolism                                                                             |

| Gene Name / GenBank<br>Accession Number <sup>2</sup> | Exponential phase |            |              | Stationary phase |         |             | Protein Name / GenBank definition <sup>2</sup>             | Confidence<br>class <sup>2</sup> | Function <sup>2</sup>                                                                                                                                           |
|------------------------------------------------------|-------------------|------------|--------------|------------------|---------|-------------|------------------------------------------------------------|----------------------------------|-----------------------------------------------------------------------------------------------------------------------------------------------------------------|
|                                                      | SCV/WT            | SCV/REV    | WT/REV       | SCV/WT           | SCV/REV | WT/REV      |                                                            |                                  |                                                                                                                                                                 |
| PA2304                                               | -6.0 (3.6)        |            |              |                  |         |             | hypothetical protein                                       | Class 4                          | Hypothetical, unclassified, unknown                                                                                                                             |
| PA2305                                               |                   |            |              | -6.4 (4.9)       |         |             | probable non-ribosomal peptide synthetase                  | Class 3                          | Putative enzymes                                                                                                                                                |
| PA2384                                               |                   |            |              | -4.3 (0.4)       |         | 4.9 (0.8)   | hypothetical protein                                       | Class 4                          | Hypothetical, unclassified, unknown                                                                                                                             |
| PA2386_pvdA                                          |                   |            |              | -8.4 (5.8)       |         | 3.5 (1.1)   | L-ornithine N5-oxygenase                                   | Class 1                          | Adaptation, protection                                                                                                                                          |
| PA2390                                               | -10.4 (4.5)       |            |              |                  |         |             | probable ATP-binding/permease fusion ABC transporter       | Class 3                          | Membrane proteins;Transport of small molecules                                                                                                                  |
| PA2398_fpvA                                          |                   |            |              | -2.4 (0.5)       |         | 2.6 (0.3)   | ferripyoverdine receptor                                   | Class 1                          | Transport of small molecules                                                                                                                                    |
| PA2407                                               |                   |            |              |                  |         | 2.1 (0.1)   | probable adhesion protein                                  | Class 3                          | Motility & Attachment                                                                                                                                           |
| PA2408                                               |                   |            |              | -9.1 (2.2)       |         |             | probable ATP-binding component of ABC transporter          | Class 3                          | Transport of small molecules                                                                                                                                    |
| PA2409                                               |                   |            |              | -9.2 (5.9)       |         |             | probable permease of ABC transporter                       | Class 3                          | Membrane proteins;Transport of small molecules                                                                                                                  |
| PA2411                                               |                   |            |              | -9.4 (4.6)       |         |             | probable thioesterase                                      | Class 3                          | Adaptation, protection;Putative enzymes                                                                                                                         |
| PA2412                                               |                   |            |              | -2.8 (0.3)       |         | 3.9 (1.0)   | conserved hypothetical protein                             | Class 4                          | Hypothetical, unclassified, unknown                                                                                                                             |
| PA2413                                               |                   |            |              | -4.9 (3.4)       |         |             | probable class III aminotransferase                        | Class 3                          | Putative enzymes                                                                                                                                                |
| PA2422                                               |                   |            |              |                  |         | -3.1 (0.4)  | hypothetical protein                                       | Class 4                          | Hypothetical, unclassified, unknown                                                                                                                             |
| PA2424_pvdL                                          |                   |            |              |                  |         | 15.2 (8.8)  | hypothetical protein                                       | Class 1                          | Adaptation, protection                                                                                                                                          |
| PA2432                                               |                   |            |              |                  |         | 4.6 (2.4)   | PvdL                                                       | Class 3                          | Transcriptional regulators                                                                                                                                      |
| PA2433                                               | -21.6 (12.5)      |            | 16.1 (12.4)  |                  |         |             | probable transcriptional regulator                         | Class 4                          | Hypothetical, unclassified, unknown                                                                                                                             |
| PA2441                                               | -3.4 (0.4)        |            |              |                  |         |             | hypothetical protein                                       | Class 4                          | Hypothetical, unclassified, unknown                                                                                                                             |
| PA2442_gcvT2                                         | 5.0 (1.2)         | 15.4 (6.2) |              |                  |         |             | hypothetical protein                                       | Class 4                          | Hypothetical, unclassified, unknown                                                                                                                             |
| PA2450                                               | -3.6 (1.2)        |            |              |                  |         |             | glycine cleavage system protein T2                         | Class 2                          | Amino acid biosynthesis and metabolism;Central intermediary metabolism                                                                                          |
| PA2450                                               | -3.3 (1.0)        |            |              |                  |         |             | hypothetical protein                                       | Class 4                          | Hypothetical, unclassified, unknown                                                                                                                             |
| PA2475                                               | -18.3 (0.6)       |            |              |                  |         |             | probable cytochrome P450                                   | Class 3                          | Adaptation, protection;Putative enzymes                                                                                                                         |
| PA2476_dsbG                                          | -58.9 (5.0)       |            | 56.0 (6.3)   | -11.7 (1.1)      |         | 11.4 (1.8)  | thiol:disulfide interchange protein DsbG                   | Class 2                          | Chaperones & heat shock proteins;Translation, post-translational modification, degradation                                                                      |
| PA2477                                               | -41.1 (5.6)       |            | 132.8 (49.2) | -14.6 (11.7)     |         | 37.0 (12.3) | probable thiol:disulfide interchange protein               | Class 3                          | Putative enzymes;Membrane proteins                                                                                                                              |
| PA2478                                               | -111.7 (38.2)     |            | 217.0 (56.1) | -49.6 (5.2)      |         | 50.6 (22.9) | probable thiol:disulfide interchange protein               | Class 3                          | Putative enzymes;Membrane proteins                                                                                                                              |
| PA2479                                               | -13.9 (4.0)       |            | 9.2 (3.3)    | -6.9 (1.7)       |         | 6.5 (2.0)   | probable two-component response regulator                  | Class 3                          | Transcriptional regulators;Two-component regulatory systems                                                                                                     |
| PA2480                                               | -18.8 (4.8)       |            | 82.5 (52.3)  | -3.8 (0.9)       |         | 6.5 (1.1)   | probable two-component sensor                              | Class 3                          | Two-component regulatory systems                                                                                                                                |
| PA2506                                               | -82.0 (9.8)       |            | 34.0 (9.1)   | -18.6 (3.1)      |         | 15.6 (2.6)  | hypothetical protein                                       | Class 4                          | Hypothetical, unclassified, unknown                                                                                                                             |
| PA2537                                               | -13.4 (6.7)       |            |              |                  |         |             | probable acyltransferase                                   | Class 3                          | Fatty acid and phospholipid metabolism                                                                                                                          |
| PA2538                                               | -7.5 (0.4)        |            | 2.8 (0.5)    |                  |         |             | hypothetical protein                                       | Class 4                          | Hypothetical, unclassified, unknown;Membrane proteins                                                                                                           |
| PA2540                                               | -5.1 (1.8)        |            |              |                  |         |             | conserved hypothetical protein                             | Class 4                          | Hypothetical, unclassified, unknown                                                                                                                             |
| PA2580                                               | -3.9 (1.3)        |            |              |                  |         |             | conserved hypothetical protein                             | Class 4                          | Putative enzymes                                                                                                                                                |
| PA2684                                               | -4.4 (0.3)        |            |              |                  |         |             | conserved hypothetical protein                             | Class 4                          | Hypothetical, unclassified, unknown                                                                                                                             |
| PA2694                                               | -4.3 (0.8)        |            |              |                  |         |             | probable thioredoxin                                       | Class 3                          | Energy metabolism                                                                                                                                               |
| PA2711                                               | -3.0 (0.3)        |            |              |                  |         |             | probable periplasmic spermidine/putrescine-binding protein | Class 3                          | Transport of small molecules                                                                                                                                    |
| PA2747                                               |                   | 5.1 (2.4)  | 3.7 (1.4)    | 4.4 (0.8)        |         | -2.7 (0.1)  | hypothetical protein                                       | Class 4                          | Hypothetical, unclassified, unknown                                                                                                                             |
| PA2755_eco                                           | -4.5 (1.1)        |            | 4.1 (0.1)    |                  |         |             | ecotin precursor                                           | Class 2                          | Translation, post-translational modification, degradation                                                                                                       |
| PA2780                                               | -12.6 (6.8)       |            | 21.3 (13.7)  | -23.6 (11.5)     |         | 85.3 (22.7) | hypothetical protein                                       | Class 4                          | Hypothetical, unclassified, unknown                                                                                                                             |
| PA2781                                               | -26.6 (9.4)       |            | 49.1 (49.9)  | -14.3 (4.0)      |         | 22.9 (13.5) | hypothetical protein                                       | Class 4                          | Hypothetical, unclassified, unknown                                                                                                                             |
| PA2805                                               |                   | 4.2 (0.6)  |              |                  |         |             | hypothetical protein                                       | Class 4                          | Hypothetical, unclassified, unknown                                                                                                                             |
| PA2827                                               |                   | 3.4 (0.4)  |              |                  |         |             | conserved hypothetical protein                             | Class 4                          | Hypothetical, unclassified, unknown                                                                                                                             |
| PA2853_oprI                                          |                   |            |              |                  |         | 2.3 (0.1)   | outer membrane lipoprotein OprI precursor                  | Class 1                          | Membrane proteins                                                                                                                                               |
| PA2883                                               |                   | 4.4 (0.7)  |              |                  |         |             | hypothetical protein                                       | Class 4                          | Hypothetical, unclassified, unknown                                                                                                                             |
| PA3021                                               |                   |            | 3.2 (1.3)    |                  |         |             | hypothetical protein                                       | Class 4                          | Hypothetical, unclassified, unknown                                                                                                                             |
| PA3031                                               |                   |            |              |                  |         |             | hypothetical protein                                       | Class 4                          | Hypothetical, unclassified, unknown                                                                                                                             |
| PA3038                                               |                   |            |              |                  |         | -3.2 (1.0)  | probable porin                                             | Class 3                          | Transport of small molecules                                                                                                                                    |
| PA3049_rmf                                           |                   | 6.7 (2.6)  |              |                  |         |             | ribosome modulation factor                                 | Class 2                          | Translation, post-translational modification, degradation                                                                                                       |
| PA3126_lbpA                                          |                   | 5.3 (1.8)  |              |                  |         |             | heat-shock protein lbpA                                    | Class 2                          | Chaperones & heat shock proteins                                                                                                                                |
| PA3161_himD                                          |                   | 2.5 (0.1)  |              |                  |         |             | integration host factor beta subunit                       | Class 1                          | DNA replication, recombination, modification and repair;Transcription, RNA processing and degradation;Translation, post-translational modification, degradation |
| PA3205                                               |                   |            |              |                  |         | 2.9 (0.7)   | hypothetical protein                                       | Class 4                          | Hypothetical, unclassified, unknown                                                                                                                             |
| PA3214                                               |                   | 2.4 (0.3)  |              |                  |         |             | hypothetical protein                                       | Class 4                          | Hypothetical, unclassified, unknown                                                                                                                             |
| PA3234                                               |                   |            |              | -4.1 (2.0)       |         |             | probable sodium:solute symporter                           | Class 3                          | Membrane proteins;Transport of small molecules                                                                                                                  |
| PA3235                                               |                   |            |              | -17.8 (9.5)      |         |             | conserved hypothetical protein                             | Class 4                          | Hypothetical, unclassified, unknown;Membrane proteins                                                                                                           |
| PA3245_minE                                          |                   | 2.5 (0.3)  |              |                  |         |             | cell division topological specificity factor MinE          | Class 2                          | Cell division                                                                                                                                                   |
| PA3250                                               |                   |            |              |                  |         | 2.2 (0.1)   | hypothetical protein                                       | Class 4                          | Hypothetical, unclassified, unknown                                                                                                                             |
| PA3274                                               |                   |            |              |                  |         | 2.7 (0.4)   | hypothetical protein                                       | Class 4                          | Hypothetical, unclassified, unknown                                                                                                                             |
| PA3286                                               |                   | 3.0 (0.5)  |              |                  |         |             | hypothetical protein                                       | Class 4                          | Hypothetical, unclassified, unknown                                                                                                                             |
| PA3307                                               | 4.1 (0.1)         | -2.4 (0.4) |              |                  |         |             | hypothetical protein                                       | Class 4                          | Hypothetical, unclassified, unknown                                                                                                                             |
| PA3329                                               |                   |            |              |                  |         | 11.4 (8.7)  | hypothetical protein                                       | Class 4                          | Hypothetical, unclassified, unknown                                                                                                                             |
| PA3330                                               |                   |            |              | -7.4 (6.1)       |         |             | probable short chain dehydrogenase                         | Class 3                          | Putative enzymes                                                                                                                                                |
| PA3331                                               |                   |            |              | -3.1 (0.6)       |         | 7.6 (1.6)   | cytochrome P450                                            | Class 2                          | Adaptation, protection;Carbon compound catabolism                                                                                                               |
| PA3332                                               |                   |            |              |                  |         | 3.2 (0.8)   | conserved hypothetical protein                             | Class 4                          | Hypothetical, unclassified, unknown                                                                                                                             |
| PA3369                                               |                   |            |              | 6.5 (0.4)        |         | -4.9 (0.3)  | hypothetical protein                                       | Class 4                          | Hypothetical, unclassified, unknown;Membrane proteins                                                                                                           |
| PA3370                                               |                   |            |              | 4.5 (0.6)        |         | -4.0 (0.2)  | hypothetical protein                                       | Class 4                          | Hypothetical, unclassified, unknown;Membrane proteins                                                                                                           |
| PA3371                                               |                   |            |              | -3.1 (0.2)       |         |             | hypothetical protein                                       | Class 4                          | Hypothetical, unclassified, unknown                                                                                                                             |
| PA3407_hasAp                                         |                   |            |              | -8.2 (4.6)       |         | 6.0 (2.0)   | heme acquisition protein HasAp                             | Class 1                          | Transport of small molecules                                                                                                                                    |
| PA3445                                               |                   |            | -4.5 (1.9)   |                  |         |             | conserved hypothetical protein                             | Class 4                          | Hypothetical, unclassified, unknown                                                                                                                             |
| PA3517                                               |                   | -5.4 (2.7) |              |                  |         |             | probable lyase                                             | Class 3                          | Carbon compound catabolism                                                                                                                                      |
| PA3530                                               |                   |            | 10.8 (6.1)   |                  |         |             | conserved hypothetical protein                             | Class 4                          | Hypothetical, unclassified, unknown                                                                                                                             |
| PA3531_bfrB                                          |                   |            | -3.5 (0.6)   |                  |         |             | bacterioferritin                                           | Class 2                          | Transport of small molecules;Adaptation, protection                                                                                                             |
| PA3552                                               | 4.5 (1.3)         |            |              |                  |         |             | conserved hypothetical protein                             | Class 4                          | Hypothetical, unclassified, unknown                                                                                                                             |
| PA3611                                               | -2.6 (0.5)        |            |              |                  |         |             | hypothetical protein                                       | Class 4                          | Hypothetical, unclassified, unknown                                                                                                                             |
| PA3631                                               | -4.2 (0.6)        |            |              |                  |         |             | conserved hypothetical protein                             | Class 4                          | Hypothetical, unclassified, unknown                                                                                                                             |
| PA3662                                               |                   | -2.3 (0.2) |              |                  |         |             | hypothetical protein                                       | Class 4                          | Hypothetical, unclassified, unknown                                                                                                                             |
| PA3691                                               |                   | -3.0 (0.5) |              |                  |         |             | hypothetical protein                                       | Class 4                          | Hypothetical, unclassified, unknown                                                                                                                             |
|                                                      |                   | -2.0 (0.1) |              |                  |         |             | hypothetical protein                                       | Class 4                          | Hypothetical, unclassified, unknown                                                                                                                             |

| Gene Name / GenBank<br>Accession Number <sup>2</sup> | Exponential phase |            |              | Stationary phase |         |              | Protein Name / GenBank definition <sup>2</sup>                | Confidence<br>class <sup>2</sup> | Function <sup>2</sup>                                                                     |
|------------------------------------------------------|-------------------|------------|--------------|------------------|---------|--------------|---------------------------------------------------------------|----------------------------------|-------------------------------------------------------------------------------------------|
|                                                      | SCV/WT            | SCV/REV    | WT/REV       | SCV/WT           | SCV/REV | WT/REV       |                                                               |                                  |                                                                                           |
| PA3716                                               | -2.7 (0.3)        |            |              |                  |         |              | hypothetical protein                                          | Class 4                          | Hypothetical, unclassified, unknown                                                       |
| PA3720                                               |                   |            |              |                  |         | -10.0 (6.3)  | hypothetical protein                                          | Class 4                          | Hypothetical, unclassified, unknown                                                       |
| PA3729                                               | -5.6 (1.3)        |            | 3.1 (0.6)    |                  |         |              | conserved hypothetical protein                                | Class 4                          | Hypothetical, unclassified, unknown                                                       |
| PA3779                                               |                   |            |              |                  |         | -5.3 (2.9)   | hypothetical protein                                          | Class 4                          | Hypothetical, unclassified, unknown                                                       |
| PA3790_oprC                                          | 25.8 (11.3)       | 9.6 (7.5)  |              |                  |         |              | putative copper transport outer membrane porin OprC precursor | Class 1                          | Transport of small molecules                                                              |
| PA3813_iscU                                          |                   | -2.2 (0.2) |              |                  |         |              | probable iron-binding protein IscU                            | Class 3                          | Biosynthesis of cofactors, prosthetic groups and carriers                                 |
| PA3819                                               | 4.0 (0.0)         | 2.3 (0.2)  |              |                  |         |              | conserved hypothetical protein                                | Class 4                          | Hypothetical, unclassified, unknown;Membrane proteins                                     |
| PA3841_exoS                                          | 90.6 (33.3)       | 3.9 (0.8)  | -22.2 (11.2) | 5.5 (1.9)        |         |              | exoenzyme S                                                   | Class 1                          | Secreted Factors (toxins, enzymes, alginate)                                              |
| PA3842                                               | 29.6 (11.6)       | 3.2 (0.8)  | -8.6 (3.8)   |                  |         |              | probable chaperone                                            | Class 3                          | Chaperones & heat shock proteins;Secreted Factors (toxins, enzymes, alginate)             |
| PA3843                                               | 65.4 (6.4)        | 4.2 (0.9)  | -16.8 (3.5)  |                  |         |              | hypothetical protein                                          | Class 4                          | Hypothetical, unclassified, unknown                                                       |
| PA3901_fecA                                          | -22.2 (12.0)      |            |              |                  |         |              | Fe(III) dicitrate transport protein FecA                      | Class 2                          | Membrane proteins;Transport of small molecules                                            |
| PA3931                                               |                   |            | -3.8 (1.7)   |                  |         |              | conserved hypothetical protein                                | Class 4                          | Hypothetical, unclassified, unknown                                                       |
| PA3989_holA                                          |                   |            |              |                  |         | -8.5 (2.7)   | DNA polymerase III, delta subunit                             | Class 2                          | DNA replication, recombination, modification and repair                                   |
| PA4031_ppa                                           |                   |            |              |                  |         | -3.3 (1.2)   | inorganic pyrophosphatase                                     | Class 2                          | Central intermediary metabolism                                                           |
| PA4110_ampC                                          |                   |            | -4.6 (1.8)   |                  |         | 2.8 (0.6)    | beta-lactamase precursor                                      | Class 1                          | Adaptation, protection                                                                    |
| PA4139                                               | 16.2 (14.1)       | 11.9 (5.4) |              |                  |         |              | hypothetical protein                                          | Class 4                          | Hypothetical, unclassified, unknown                                                       |
| PA4148                                               |                   |            |              |                  |         | -20.5 (2.8)  | probable short-chain dehydrogenase                            | Class 3                          | Putative enzymes                                                                          |
| PA4195                                               |                   |            | -2.8 (0.6)   |                  |         | 21.8 (4.4)   | probable binding protein component of ABC transporter         | Class 3                          | Transport of small molecules                                                              |
| PA4217_phzS                                          |                   |            |              |                  |         | -6.5 (1.9)   | flavin-containing monooxygenase                               | Class 1                          | Putative enzymes                                                                          |
| PA4218                                               | 19.0 (15.8)       |            | -12.3 (7.2)  |                  |         |              | probable transporter                                          | Class 3                          | Membrane proteins;Transport of small molecules                                            |
| PA4220                                               | 21.3 (3.1)        |            |              |                  |         |              | hypothetical protein                                          | Class 4                          | Hypothetical, unclassified, unknown                                                       |
| PA4221_fptA                                          | 15.1 (2.6)        |            | -11.0 (1.0)  |                  |         | -17.7 (15.7) | Fe(III)-pyochelin receptor precursor                          | Class 1                          | Transport of small molecules                                                              |
| PA4223                                               | 5.6 (0.7)         |            | -4.1 (0.8)   |                  |         | -2.9 (0.5)   | probable ATP-binding component of ABC transporter             | Class 3                          | Membrane proteins;Transport of small molecules                                            |
| PA4224                                               | 3.9 (1.0)         |            | -3.4 (0.9)   |                  |         | -4.1 (1.5)   | pyochelin biosynthetic protein PchG                           | Class 1                          | Membrane proteins;Transport of small molecules                                            |
| PA4225_pchF                                          | 37.0 (5.5)        |            | -36.7 (20.2) |                  |         |              | pyochelin synthetase                                          | Class 1                          | Transport of small molecules;Secreted Factors (toxins, enzymes, alginate)                 |
| PA4226_pchE                                          | 37.4 (11.1)       |            | -40.5 (16.9) |                  |         |              | dihydroaeruginic acid synthetase                              | Class 1                          | Transport of small molecules;Secreted Factors (toxins, enzymes, alginate)                 |
| PA4228_pchD                                          | 14.2 (13.6)       |            | -17.4 (16.7) |                  |         |              | pyochelin biosynthesis protein PchD                           | Class 1                          | Transport of small molecules;Secreted Factors (toxins, enzymes, alginate)                 |
| PA4229_pchC                                          | 34.2 (6.5)        |            | -40.0 (17.3) |                  |         | -4.4 (0.9)   | pyochelin biosynthetic protein PchC                           | Class 1                          | Transport of small molecules;Secreted Factors (toxins, enzymes, alginate)                 |
| PA4230_pchB                                          | 24.3 (1.9)        |            | -28.3 (8.4)  |                  |         |              | salicylate biosynthesis protein PchB                          | Class 1                          | Transport of small molecules;Secreted Factors (toxins, enzymes, alginate)                 |
| PA4231_pchA                                          | 5.8 (0.4)         |            |              |                  |         |              | salicylate biosynthesis isochorismate synthase                | Class 1                          | Secreted Factors (toxins, enzymes, alginate);Transport of small molecules                 |
| PA4290                                               |                   |            |              |                  |         | -4.6 (2.0)   | probable chemotaxis transducer                                | Class 3                          | Adaptation, protection;Chemotaxis                                                         |
| PA4309_pctA                                          |                   |            |              |                  |         | -14.2 (10.7) | chemotactic transducer PctA                                   | Class 1                          | Adaptation, protection;Chemotaxis                                                         |
| PA4317                                               | -56.5 (28.1)      |            | 15.2 (9.5)   |                  |         |              | hypothetical protein                                          | Class 4                          | Hypothetical, unclassified, unknown;Membrane proteins                                     |
| PA4323                                               | -2.2 (0.3)        |            |              |                  |         |              | hypothetical protein                                          | Class 4                          | Hypothetical, unclassified, unknown                                                       |
| PA4326                                               |                   |            |              |                  |         | -2.4 (0.1)   | hypothetical protein                                          | Class 4                          | Hypothetical, unclassified, unknown                                                       |
| PA4370_icmP                                          | -2.7 (0.4)        |            |              |                  |         |              | Insulin-cleaving metalloproteinase                            | Class 1                          | Membrane proteins                                                                         |
| PA4389                                               | 2.4 (0.2)         | 2.2 (0.3)  |              |                  |         |              | probable short-chain dehydrogenase                            | Class 3                          | Putative enzymes                                                                          |
| PA4469                                               |                   |            |              |                  |         | -2.4 (0.2)   | hypothetical protein                                          | Class 4                          | Hypothetical, unclassified, unknown                                                       |
| PA4470_fumC1                                         |                   |            |              |                  |         | 2.4 (0.2)    | fumarate hydratase                                            | Class 1                          | Energy metabolism                                                                         |
| PA4471                                               |                   |            |              |                  |         | -2.4 (0.3)   | hypothetical protein                                          | Class 4                          | Hypothetical, unclassified, unknown                                                       |
| PA4482_gatC                                          |                   | -2.7 (0.4) |              |                  |         |              | Glu-tRNA(Gln) amidotransferase subunit C                      | Class 2                          | Translation, post-translational modification, degradation                                 |
| PA4489                                               | -2.8 (0.6)        |            |              |                  |         |              | conserved hypothetical protein                                | Class 4                          | Hypothetical, unclassified, unknown                                                       |
| PA4490                                               | -5.2 (0.8)        |            |              |                  |         |              | conserved hypothetical protein                                | Class 4                          | Hypothetical, unclassified, unknown                                                       |
| PA4491                                               | -5.5 (1.2)        |            |              |                  |         |              | conserved hypothetical protein                                | Class 4                          | Hypothetical, unclassified, unknown                                                       |
| PA4495                                               | -3.2 (0.6)        |            |              |                  |         | 2.2 (0.1)    | hypothetical protein                                          | Class 4                          | Hypothetical, unclassified, unknown                                                       |
| PA4501                                               |                   |            |              |                  |         | -4.3 (1.9)   | probable porin                                                | Class 3                          | Transport of small molecules                                                              |
| PA4513                                               | -4.2 (0.4)        |            |              |                  |         |              | probable oxidoreductase                                       | Class 3                          | Putative enzymes                                                                          |
| PA4515                                               | -3.2 (0.4)        |            |              |                  |         |              | conserved hypothetical protein                                | Class 4                          | Hypothetical, unclassified, unknown                                                       |
| PA4523                                               |                   |            |              |                  |         | -2.6 (0.5)   | hypothetical protein                                          | Class 4                          | Hypothetical, unclassified, unknown                                                       |
| PA4563_rpsT                                          |                   |            |              |                  |         | 2.8 (0.5)    | 30S ribosomal protein S20                                     | Class 2                          | Translation, post-translational modification, degradation;Central intermediary metabolism |
| PA4570                                               | -2.5 (0.3)        |            |              |                  |         | -4.4 (0.5)   | hypothetical protein                                          | Class 4                          | Hypothetical, unclassified, unknown                                                       |
| PA4607                                               |                   |            |              |                  |         | -2.7 (0.7)   | hypothetical protein                                          | Class 4                          | Hypothetical, unclassified, unknown                                                       |
| PA4611                                               | 2.6 (1.0)         | 4.7 (2.9)  |              |                  |         | 2.8 (0.3)    | hypothetical protein                                          | Class 4                          | Hypothetical, unclassified, unknown                                                       |
| PA4624                                               |                   |            | 5.7 (1.8)    |                  |         |              | hypothetical protein                                          | Class 4                          | Hypothetical, unclassified, unknown                                                       |
| PA4625                                               |                   | 3.6 (0.9)  |              |                  |         |              | hypothetical protein                                          | Class 4                          | Hypothetical, unclassified, unknown                                                       |
| PA4633                                               |                   |            |              |                  |         | -6.1 (4.6)   | probable chemotaxis transducer                                | Class 3                          | Adaptation, protection;Chemotaxis                                                         |
| PA4674                                               |                   | 5.1 (2.4)  |              |                  |         |              | conserved hypothetical protein                                | Class 4                          | Hypothetical, unclassified, unknown                                                       |
| PA4675                                               | -2.3 (0.1)        |            |              |                  |         |              | probable TonB-dependent receptor                              | Class 3                          | Transport of small molecules                                                              |
| PA4764_fur                                           |                   | 2.7 (0.4)  |              |                  |         |              | ferric uptake regulation protein                              | Class 1                          | Transcriptional regulators                                                                |
| PA4803                                               | -9.4 (2.4)        |            | 14.9 (0.8)   |                  |         | -8.5 (1.6)   | hypothetical protein                                          | Class 4                          | Hypothetical, unclassified, unknown                                                       |
| PA4826                                               |                   |            | 13.7 (0.5)   |                  |         |              | hypothetical protein                                          | Class 4                          | Hypothetical, unclassified, unknown                                                       |
| PA4843                                               |                   | -5.4 (1.2) |              |                  |         | -2.8 (0.4)   | probable two-component response regulator                     | Class 3                          | Transcriptional regulators;Two-component regulatory systems                               |
| PA4847_accB                                          |                   |            |              |                  |         | -2.6 (0.5)   | biotin carboxyl carrier protein (BCCP)                        | Class 1                          | Fatty acid and phospholipid metabolism                                                    |
| PA4893_ureG                                          |                   |            |              |                  |         | -2.5 (0.4)   | urease accessory protein UreG                                 | Class 2                          | Biosynthesis of cofactors, prosthetic groups and carriers                                 |
| PA4909                                               |                   |            |              |                  |         | -5.9 (1.8)   | probable ATP-binding component of ABC transporter             | Class 3                          | Transport of small molecules                                                              |
| PA5015_aceE                                          |                   |            |              |                  |         | -2.4 (0.4)   | pyruvate dehydrogenase                                        | Class 1                          | Amino acid biosynthesis and metabolism;Energy metabolism                                  |
| PA5016_aceF                                          |                   |            |              |                  |         | 2.3 (0.3)    | dihydropyrimidinase                                           | Class 1                          | Carbon compound catabolism;Energy metabolism                                              |
| PA5061                                               |                   |            |              |                  |         | -4.2 (1.3)   | conserved hypothetical protein                                | Class 4                          | Hypothetical, unclassified, unknown                                                       |
| PA5073                                               | -2.5 (0.4)        |            |              |                  |         |              | hypothetical protein                                          | Class 4                          | Hypothetical, unclassified, unknown                                                       |
| PA5095                                               | -2.9 (0.7)        |            |              |                  |         |              | probable permease of ABC transporter                          | Class 3                          | Membrane proteins;Transport of small molecules                                            |
| PA5113                                               | -5.1 (1.6)        |            | 4.1 (0.8)    |                  |         |              | hypothetical protein                                          | Class 4                          | Hypothetical, unclassified, unknown;Membrane proteins                                     |
| PA5163_rmlA                                          |                   |            |              |                  |         | -3.2 (0.4)   | glucose-1-phosphate thymidyltransferase                       | Class 2                          | Cell wall / LPS / capsule                                                                 |
| PA5174                                               | 2.2 (0.2)         |            |              |                  |         |              | probable beta-ketoacyl synthase                               | Class 3                          | Fatty acid and phospholipid metabolism                                                    |
| PA5178                                               |                   |            |              |                  |         | -3.3 (0.5)   | conserved hypothetical protein                                | Class 4                          | Hypothetical, unclassified, unknown                                                       |
| PA5217                                               |                   |            | 2.7 (0.4)    |                  |         | 2.6 (0.3)    | probable binding protein component of ABC iron transporter    | Class 3                          | Transport of small molecules                                                              |

| Gene Name / GenBank<br>Accession Number <sup>2</sup> | Exponential phase |             |            | Stationary phase |         |        | Protein Name / GenBank definition <sup>2</sup>                               | Confidence<br>class <sup>2</sup> | Function <sup>2</sup>                                                                |
|------------------------------------------------------|-------------------|-------------|------------|------------------|---------|--------|------------------------------------------------------------------------------|----------------------------------|--------------------------------------------------------------------------------------|
|                                                      | SCV/WT            | SCV/REV     | WT/REV     | SCV/WT           | SCV/REV | WT/REV |                                                                              |                                  |                                                                                      |
| PA5222                                               |                   |             |            |                  |         |        | hypothetical protein                                                         | Class 4                          | Hypothetical, unclassified, unknown                                                  |
| PA5240_trxA                                          | 2.3 (0.1)         | 3.1 (0.7)   |            |                  |         |        | thioredoxin                                                                  | Class 2                          | Nucleotide biosynthesis and metabolism; Translation, post-translational modification |
| PA5274_rnk                                           |                   |             |            |                  |         |        | nucleoside diphosphate kinase regulator                                      | Class 2                          | Transcriptional regulators                                                           |
| PA5287_amtB                                          |                   |             |            |                  |         |        | ammonium transporter AmtB                                                    | Class 2                          | Membrane proteins; Transport of small molecules                                      |
| PA5304_dadA                                          |                   |             |            |                  |         |        | D-amino acid dehydrogenase, small subunit                                    | Class 2                          | Amino acid biosynthesis and metabolism; Energy metabolism                            |
| PA5313                                               |                   |             |            |                  |         |        | probable pyridoxal-dependent aminotransferase                                | Class 3                          | Putative enzymes                                                                     |
| PA5316_rpmB                                          |                   |             |            |                  |         |        | 50S ribosomal protein L28                                                    | Class 2                          | Translation, post-translational modification, degradation                            |
| PA5317                                               |                   |             |            |                  |         |        | probable binding protein component of ABC dipeptide transporter              | Class 3                          | Transport of small molecules                                                         |
| PA5339                                               | 2.5 (0.4)         |             |            |                  |         |        | conserved hypothetical protein                                               | Class 4                          | Hypothetical, unclassified, unknown                                                  |
| PA5355_glcD                                          | -6.5 (7.1)        |             |            |                  |         |        | glycolate oxidase subunit GlcD                                               | Class 2                          | Central intermediary metabolism; Carbon compound catabolism                          |
| PA5424                                               |                   |             |            |                  |         |        | conserved hypothetical protein                                               | Class 4                          | Hypothetical, unclassified, unknown; Membrane proteins                               |
| PA5429_aspA                                          |                   |             |            |                  |         |        | aspartate ammonia-lyase                                                      | Class 2                          | Amino acid biosynthesis and metabolism                                               |
| PA5461                                               | 3.1 (0.7)         | 2.7 (0.3)   |            |                  |         |        | hypothetical protein                                                         | Class 4                          | Hypothetical, unclassified, unknown                                                  |
| PA5470                                               |                   |             |            |                  |         |        | probable peptide chain release factor                                        | Class 3                          | Translation, post-translational modification, degradation                            |
| PA5481                                               | -2.9 (0.7)        |             |            |                  |         |        | hypothetical protein                                                         | Class 4                          | Hypothetical, unclassified, unknown                                                  |
| PA5482                                               |                   |             |            |                  |         |        | TonB protein                                                                 | Class 4                          | Hypothetical, unclassified, unknown; Membrane proteins                               |
| PA5531_tonB                                          | -3.8 (0.1)        |             |            |                  |         |        | type IV pilin                                                                | Class 1                          | Transport of small molecules                                                         |
| L37109_pilA                                          | 7.5 (4.4)         |             |            |                  |         |        | type IV pilin                                                                | ND                               | Motility & Attachment; Cell wall / LPS / capsule                                     |
| L81176_cds3_fliD                                     | -3.0 (0.3)        | -4.0 (0.5)  |            |                  |         |        | flagellar cap protein                                                        | ND                               | Motility & Attachment; Cell wall / LPS / capsule                                     |
| L81176_cds5_fliS'                                    |                   | -2.8 (0.5)  |            |                  |         |        | hypothetical protein                                                         | ND                               | Motility & Attachment; Cell wall / LPS / capsule                                     |
| L81176_cds6_fliP                                     |                   | -3.1 (0.6)  |            |                  |         |        | type IV pili length control protein                                          | ND                               | Motility & Attachment; Cell wall / LPS / capsule                                     |
| M57501_fliA_fliC                                     | -6.2 (1.0)        | -13.6 (2.0) | -2.4 (0.2) |                  |         |        | flagellin type a                                                             | ND                               | Motility & Attachment; Cell wall / LPS / capsule                                     |
| AF332547_orfB                                        | -2.4 (0.3)        | -3.7 (0.4)  |            |                  |         |        | putative acyl carrier protein – flagellin glycosylation                      | ND                               | Motility & Attachment; Cell wall / LPS / capsule                                     |
| AF332547_orfC                                        |                   | -3.0 (0.5)  |            |                  |         |        | putative 3-oxoacyl (acyl carrier protein) synthase – flagellin glycosylation | ND                               | Motility & Attachment; Cell wall / LPS / capsule                                     |
| AF332547_orfF                                        |                   | -3.2 (0.2)  |            |                  |         |        | large subunit aromatic dioxygenase – flagellin glycosylation                 | ND                               | Motility & Attachment; Cell wall / LPS / capsule                                     |
| ig_5130767_5131427                                   |                   |             |            |                  |         |        | Intergenic region between PA4639 and PA4640, 5130767-5131427, (+) strand     |                                  |                                                                                      |
| ig_727608_721556                                     | 2.8 (0.4)         | 2.7 (0.3)   |            |                  |         |        | Intergenic region between PA0701 and PA0702, 721556-727608, (-) strand       |                                  |                                                                                      |

<sup>1</sup> For all genes with a significant differential expression (Wilcoxon Rank Test of Affymetrix Microarray Suite Software) in a magnitude of at least 2 fold in all 4 pairings of each comparison, the arithmetic average and the SD were calculated. Upregulated genes have positive values, downregulated genes are given as negative values.

<sup>†</sup> Gene annotations imposed on the 8/10/2003 by the *P. aeruginosa* Sequencing and Community Annotation Project (<http://www.pseudomonas.com>) (1). For non-PAO 1 genes the GenBank entries are given, genes of the flagella apparatus are annotated as proposed by Dasgupta *et al.* (2003).

1. Stover, C. K., X. Q. Pham, A. L. Erwin, S. D. Mizoguchi, P. Warren, M. J. Hickey, F. S. Brinkman, W. O. Hufnagle, D. J. Kowalik, M. Lagrou, R. L. Garber, L. Goltry, E. Tolentino, S. Westbrook-Wadman, Y. Yuan, L. L. Brody, S. N. Coulter, K. R. Folger, A. Kas, K. Larbig, R. Lim, K. Smith, D. Spencer, G. K. Wong, Z. Wu, I. T. Paulsen, J. Reizer, M. H. Saier, R. E. Hancock, S. Lory, and M. V. Olson. 2000. Complete genome sequence of *Pseudomonas aeruginosa* PA01, an opportunistic pathogen. *Nature* 406:959-964.

2. Dasgupta, N., M. C. Wolfgang, A. L. Goodman, S. K. Arora, J. Jyot, S. Lory, and R. Ramphal. 2003. A four-tiered transcriptional regulatory circuit controls flagellar biogenesis in *Pseudomonas aeruginosa*. *Molecular Microbiology* 50:809-824.

**FIGURE 6.** Genes of *P. aeruginosa* PAO1 not included in the genome of *P. aeruginosa* 20265 (shown are gene clusters of at least 3 genes).

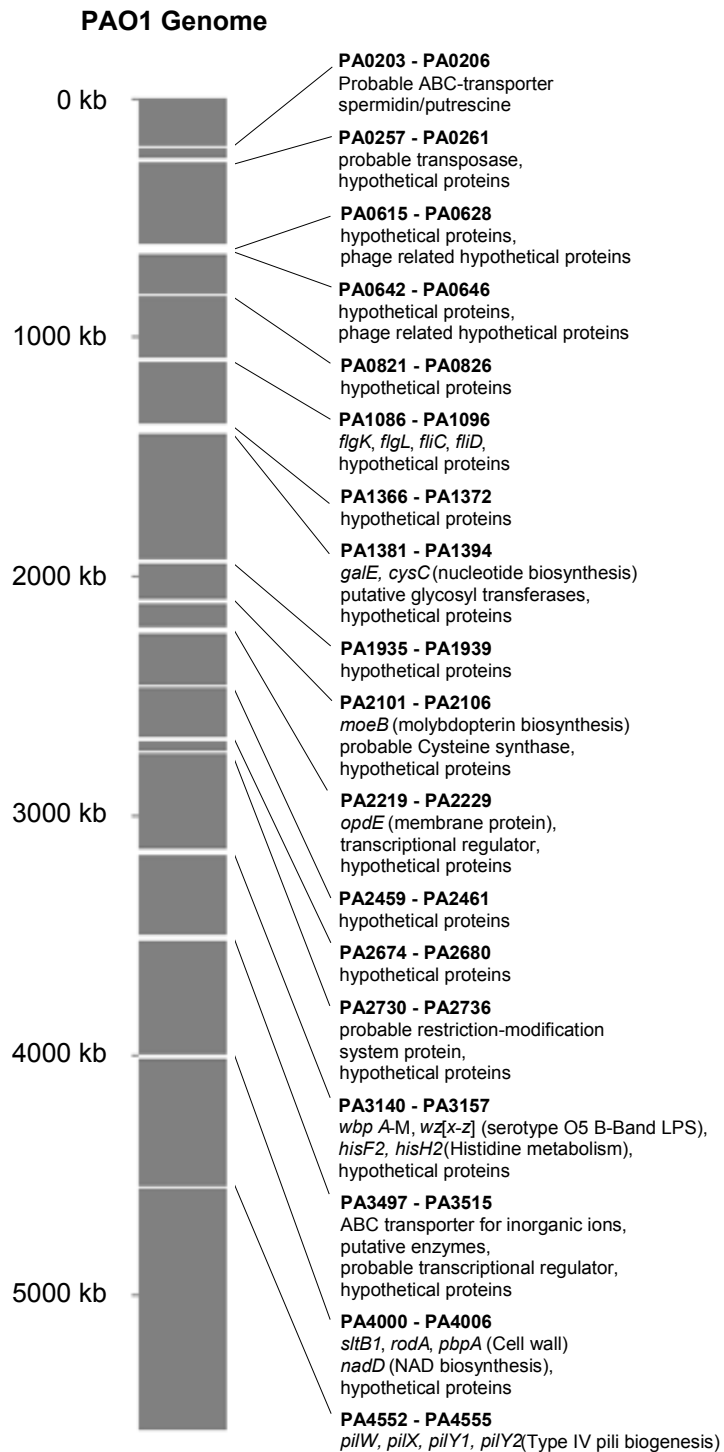

Supplement: jbacter_186_12_3837__1.pdf [file jbacter_186_12_3837__1.pdf]
